# Supplementary material for: Health and cost impact of stepping down asthma medication for UK patients, 2001–2017: A population-based observational study
Source: PLoS Med. 2020 Jul 21;17(7):e1003145. doi: 10.1371/journal.pmed.1003145 (PMC7373267; doi:10.1371/journal.pmed.1003145)
Supplement: S3 Table — (XLSX) [file pmed.1003145.s004.xlsx]

## Sheet: Sheet1
	Exacerbation history	Drug stepped-down	Adjusted HR	95% CI	p-value
	Yes	None	Reference
		ICS	0.83	0.76-0.91	<0.001
		LABA	0.85	0.70-1.03	0.099
		Other add-on	1.1	0.95-1.28	0.191
	No	None	Reference
		ICS	0.78	0.74-0.82	<0.001
		LABA	1.06	0.95-1.19	0.277
		Other add-on	1.05	0.94-1.18	0.366
